# Supplementary material
Source: PubMed Central journal article supplement (PMC2715281)
Supplement: NIHMS104348-supplement-2.pdf [file NIHMS104348-supplement-2.pdf]

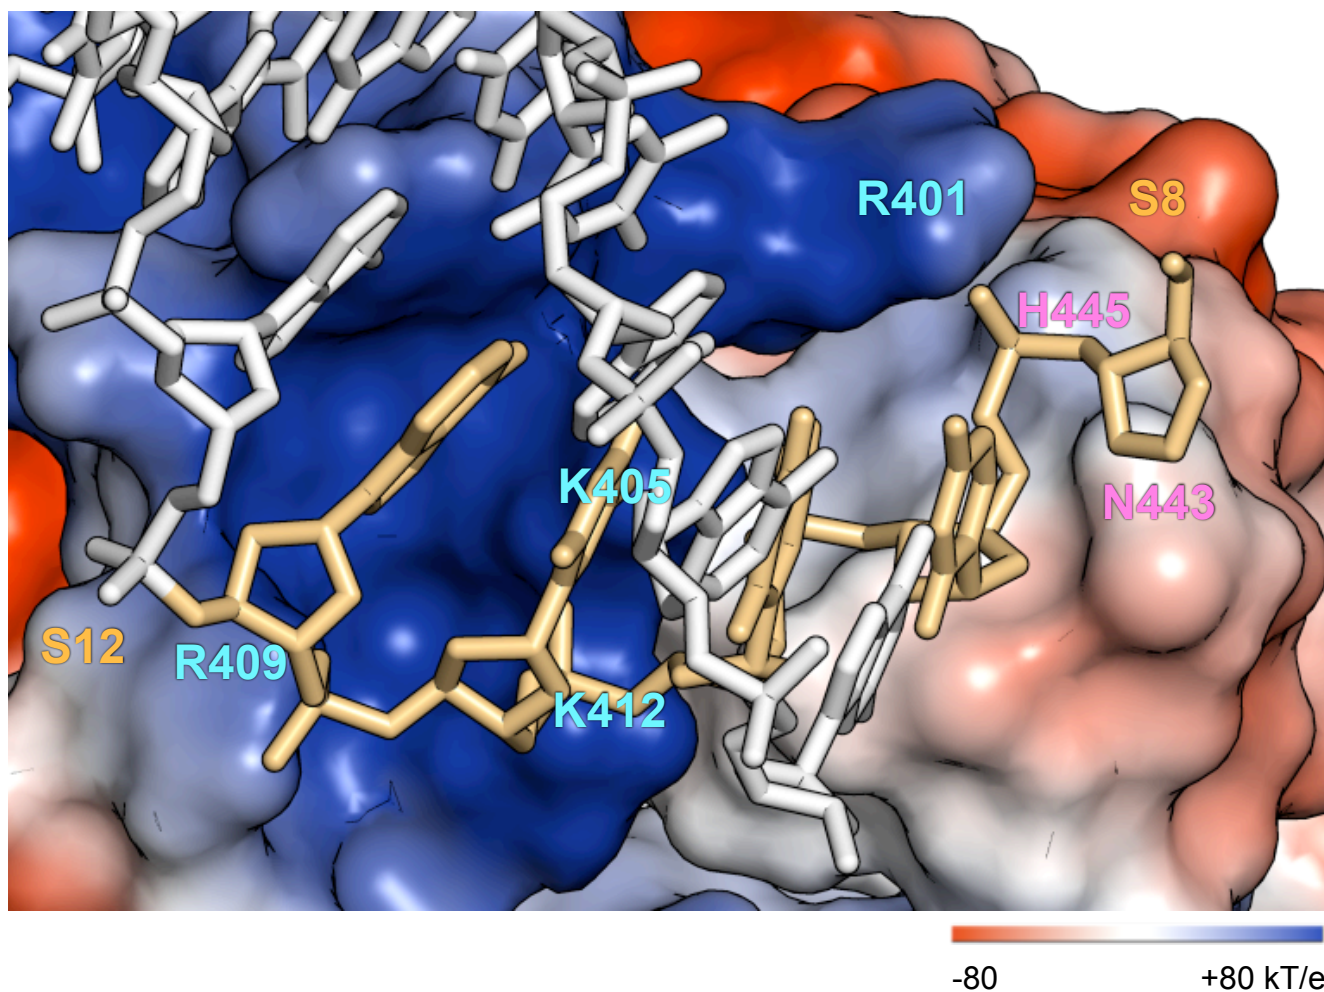

**Supplementary Figure 2** NBD-DNA interactions in the spacer. Surface electrostatic potential of the NBD dimer is shown. Bases in the top strand of the spacer, numbered S8-S12, are colored beige, while all other bases are colored gray. Conformational and electrostatic complementarity between the NBD and DNA in the spacer are contributed in *cis* (cyan) by Arg401, Lys405, Arg409, and Lys412 and in *trans* (pink) by Asn443 and His445 of the other subunit.
