# Supplementary material
Source: PubMed Central journal article supplement (PMC2715281)
Supplement: NIHMS104348-supplement-6.pdf [file NIHMS104348-supplement-6.pdf]

### Quenching of FAM fluorescence in A, B, and C donor substrates

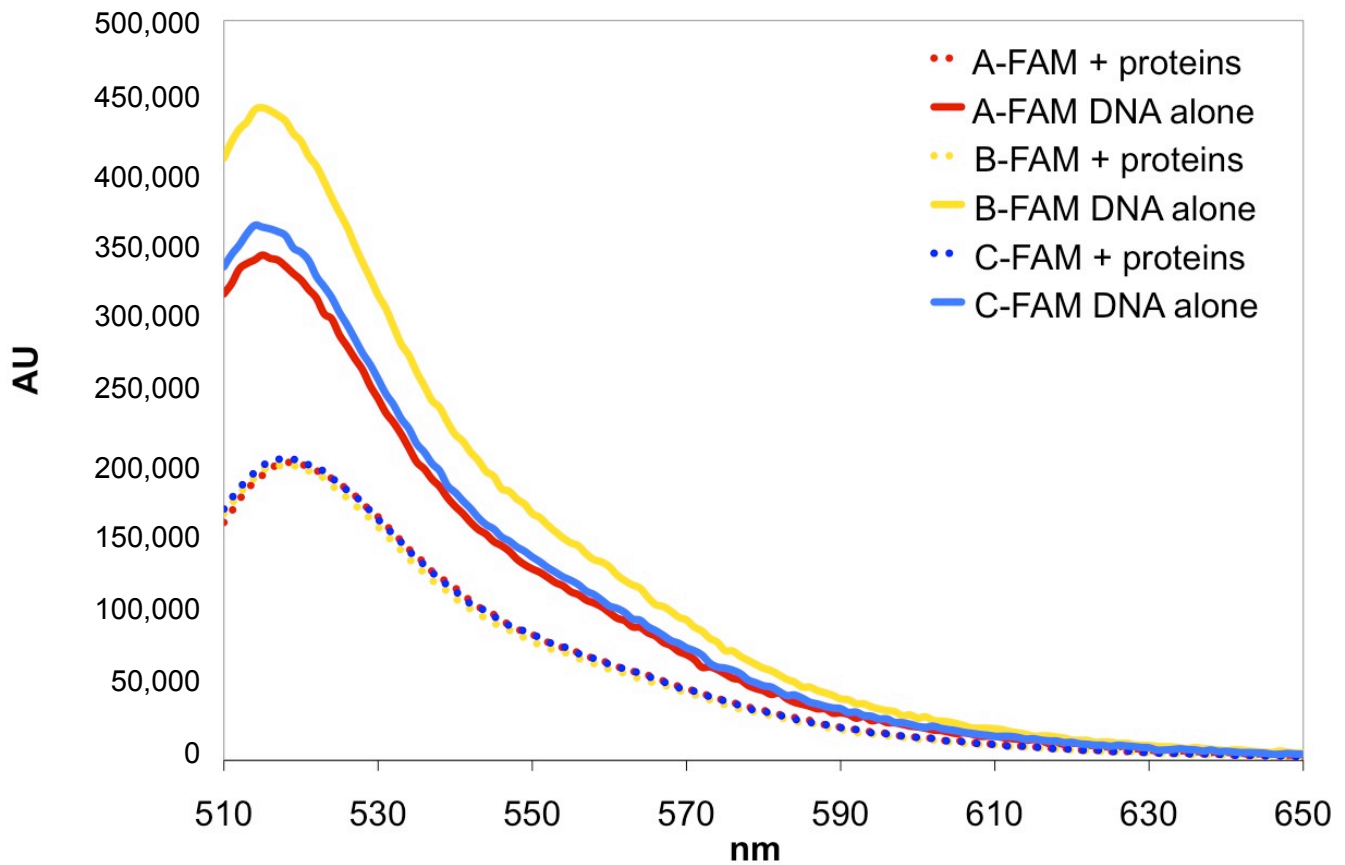

**Supplementary Figure 6** Protein binding reduces FAM fluorescence in all donor substrates. For each 12/23 RSS pair (A, B, and C; see **Fig. 6a**), the corrected emission spectra of reactions containing the FAM-labeled donor substrate and a 4-fold molar excess of the unlabeled partner RSS with (dotted line) or without (solid line) proteins (RAG1/RAG2/HMGB1) are shown. These control experiments show that, in the absence of the acceptor fluorophore, protein addition substantially reduces donor fluorophore emission, indicative of protein-fluorophore interactions.
