# Supplementary material
Source: PubMed Central journal article supplement (PMC2715281)
Supplement: NIHMS104348-supplement-8.pdf [file NIHMS104348-supplement-8.pdf]

**Supplementary Table 1** List of oligonucleotides

| NAME                                                                                                                 | SEQUENCE                                                                |
|----------------------------------------------------------------------------------------------------------------------|-------------------------------------------------------------------------|
| <b>DNA used for crystallography</b>                                                                                  |                                                                         |
| Native                                                                                                               | 5'-ACTTAACAAAAACC<br>3'-GAATTGTTTTTGGT                                  |
| 56DNA                                                                                                                | 5'-AGTTTTTCAGAAACC<br>3'-CAAAAGTCTTTGGA                                 |
| <b>RSSs used for 12-SC and cleavage experiments:</b><br>Top strand is shown 5'→3'.<br>Lower case indicates mutation. |                                                                         |
| Consensus 12RSS                                                                                                      | GATCTGGCCTGTCTTACACAGTGATACAGACCTTA<br>ACAAAAACCTGCACTCGAGCGGAG         |
| Consensus 23RSS                                                                                                      | GATCTGGCCTGTCTTACACAGTGATGGAAGCTCAATCTGAACTCT<br>GACAAAAACCTCGAGCGGAG   |
| 12RSS with G <sub>2</sub> → A<br>mutation                                                                            | GATCTGGCCTGTCTTACACAGTGATACAGACCTTA<br>A(t)AAAAACCTGCACTCGAGCGGAG       |
| 23RSS with G <sub>2</sub> → A<br>mutation                                                                            | GATCTGGCCTGTCTTACACAGTGATGGAAGCTCAATCTGAACTCT<br>GA(t)AAAAACCTCGAGCGGAG |

**Supplementary Table 1** List of oligonucleotides (continued)

| <b>FRET Oligonucleotides:</b><br>Only the strand containing the fluorophore is shown 5'→ 3'.<br>/iFluorT/ = Internal FAM labeling on thymine<br>/i6-TAMN/ = Internal TAMRA labeling on thymine<br>(bottom) = Bottom strand is fluorescently labeled; otherwise the top strand sequence is shown. |                                                                                   |                                                      |
|--------------------------------------------------------------------------------------------------------------------------------------------------------------------------------------------------------------------------------------------------------------------------------------------------|-----------------------------------------------------------------------------------|------------------------------------------------------|
| 12-A-FAM                                                                                                                                                                                                                                                                                         | GATCTGGCCTGTCTTACACAGTGATACAGACCTTAACAAAAAC<br>C/iFluorT/GCACTCGAGCGGAG           | A pair                                               |
| 23-A-TAMRA<br>(bottom)                                                                                                                                                                                                                                                                           | CTCCGCTCGAGGTTTTTGTGTCAGAG/i6-TAMN/<br>TCAGATTGAGCTTCCATCACTGTGTAAGACAGGCCAGATC   |                                                      |
| 12-B-TAMRA<br>(bottom)                                                                                                                                                                                                                                                                           | CTCCGCTCGAGTGCAGGTTTTTG/i6-TAMN/<br>TAAGGTCTGTATCACTGTGTAAGACAGGCCAGATC           | B pair                                               |
| 23-B-FAM<br>(bottom)                                                                                                                                                                                                                                                                             | CTCCGCTCGAGGTTTTTG/iFluorT/<br>CAGAGTTCAGATTGAGCTTCCATCACTGTGTAAGACAGGCCA<br>GATC |                                                      |
| 12-C-TAMRA<br>(bottom)                                                                                                                                                                                                                                                                           | CTCCGCTCGAGTGCAGGTTTTTGTTAAGG/i6-TAMN/<br>CTGTATCACTGTGTAAGACAGGCCAGATC           | C pair                                               |
| 23-C-FAM                                                                                                                                                                                                                                                                                         | GATCTGGCCTGTCTTACACAGTGATGGAAGCTCAATCTGAACT<br>CTGACAAAAACC/iFluorT/CGAGCGGAG     |                                                      |
| 12-A-FAM<br>nonamer<br>mutant                                                                                                                                                                                                                                                                    | GATCTGGCCTGTCTTACACAGTGATACAGACCTTACTCTGGCT<br>G/iFluorT/GCACTCGAGCGGAG           | Nonamer-<br>mutant<br>(NON <sub>mut</sub> )<br>pair  |
| 23-A-TAMRA<br>nonamer<br>mutant<br>(bottom)                                                                                                                                                                                                                                                      | CTCCGCTCGACAGCCAGAGCAGAG/i6-TAMN/<br>TCAGATTGAGCTTCCATCACTGTGTAAGACAGGCCAGATC     |                                                      |
| 12-A-FAM<br>heptamer<br>mutant                                                                                                                                                                                                                                                                   | GATCTGGCCTGTCTTAGCTCAGTATACAGACCTTAACAAAAAC<br>C/iFluorT/GCACTCGAGCGGAG           | Heptamer-<br>mutant<br>(HEP <sub>mut</sub> )<br>pair |
| 23-A-TAMRA<br>heptamer<br>mutant<br>(bottom)                                                                                                                                                                                                                                                     | CTCCGCTCGAGGTTTTTGTGTCAGAG/i6-TAMN/<br>TCAGATTGAGCTTCCATACTGAGCTAAGACAGGCCAGATC   |                                                      |
| 12-A-FAM<br>nonspecific                                                                                                                                                                                                                                                                          | GATCTGGCCTGTCTTAGCTCAGTATACAGACCTTACTCTGGCTG<br>/iFluorT/GCACTCGAGCGGAG           | Nonspecific<br>(Nsp) DNA<br>pair                     |
| 23-A-TAMRA<br>nonspecific<br>(bottom)                                                                                                                                                                                                                                                            | CTCCGCTCGACAGCCAGAGCAGAG/i6-TAMN/<br>TCAGATTGAGCTTCCATACTGAGCTAAGACAGGCCAGATC     |                                                      |
